# Supplementary material
Source: publisher figshare collection journal article supplement (https://aacr.figshare.com/articles/dataset/_/22473164)
Supplement: Supplementary file 1 [file 39924656]

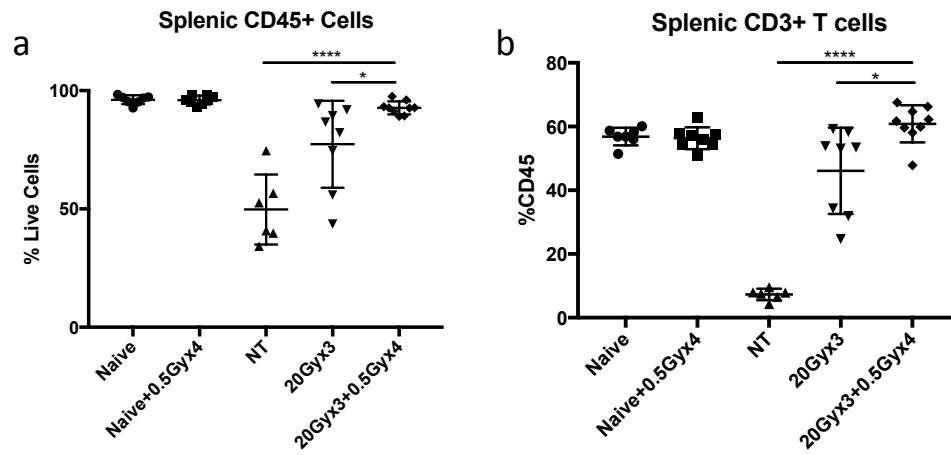

**Supplementary Figure5. Increased splenic T cell responses in PAM RT treated mice**

Spleen phenotyping by flow cytometry 19 days after primary tumor ablation. a) Splenic CD45+ cells. B) Splenic CD3+ T cells.

\*  $p < 0.05$ , \*\*\*\*  $p < 0.0001$  by ANOVA multiple comparison all panels
